## **How do dopamine neurons resolve a tradeoff between performance and energy?**

Minryung R. Song<sup>1</sup>, Sang Wan Lee<sup>1\*</sup>

<sup>1</sup>Department of Bio and Brain Engineering, Korea Advanced Institute of Science and Technology, Daejeon, South Korea

\*Corresponding author:

E-mail: [sangwan@kaist.ac.kr](mailto:sangwan@kaist.ac.kr) (SWL)

# 1 **How do dopamine neurons resolve a tradeoff between performance and energy?**

2

## 3 **Abstract**

4 The reinforcement learning (RL) theory accounts for the two types of dopamine activity patterns:  
5 phasic and ramping. However, we still lack an understanding of when and why dopamine activity  
6 transitions between the two modes. This study examines a theoretical possibility that dopamine  
7 neurons ramp up, though it is a physiologically demanding job, to distribute cognitive resources  
8 in both space and time, while they transition to an energy-efficient phasic firing mode to  
9 concentrate cognitive resources on learning reward-predicting cues. These results lend better  
10 insight into how animals find tradeoffs between task performance maximization and resource  
11 consumption minimization.

12

## 13 **Introduction**

14 Midbrain dopamine neurons have been found to be important in RL. The dopamine neurons  
15 phasically respond to rewards and reward-predicting cues, the size of which reflects the reward  
16 prediction error (RPE) [1–6]. Phasic dopamine activity has been found to drive RL [7–10], and  
17 dopamine in the striatum modulates corticostriatal synaptic plasticity [11–13].

18 Based on these findings, computational efforts have been made to account for the role of  
19 dopamine in RL. The models have often considered dopamine activity as the RPE and well-  
20 simulated phasic dopamine responses to experimentally inserted cues and rewards [1,14–16]. RL  
21 models have also provided an explanation for the gradually increasing dopamine activity as  
22 animals approach a reward by considering internal spatial representation, the temporal decay of  
23 dopamine-dependent synaptic potentiation, the uncertainty of action timing or discounted vigor or  
24 by assuming dopamine as a value signal [17–20].

25 However, the patterns of dopamine activity may change, rather than being fixed to phasic or  
26 ramping patterns. A recent study observed that dopamine activity transitions from ramping to  
27 phasic as learning proceeds and transitions from phasic to ramping when reward values change

28 [21]. No RL model has accounted for in which condition dopamine activity transitions between  
29 ramping and phasic. We hypothesize that the dopamine transitions might support the re-allocation  
30 of cognitive resources during RL.

31

### 32 **Dopamine modulates resource allocation**

33 Efficient resource allocation is as important as reward maximization for the survival of animals.  
34 Resource allocation is tightly linked with locomotion, attention and learning [22]. To use their  
35 biological resources efficiently, animals should quickly learn which stimuli are highly informative  
36 regarding rewards and be particularly responsive to more informative stimuli. Conversely, to  
37 quickly learn and respond to key stimuli, animals should allocate their resources to reward-  
38 informative stimuli. Animals approach, learn, exploit, explore and pay attention to (potentially)  
39 important stimuli and changes that occur to these stimuli.

40 A potential neural substrate for resource allocation is the midbrain dopamine neurons. Previous  
41 studies have found that a bilateral dopamine lesion reduces the possibility of high-effort, high-  
42 reward choices, while increasing the possibility of low-effort, low-reward choices [23,24]. In the  
43 striatum, dopamine inhibition decreases the initiation and maintenance of instrumental response,  
44 while dopamine excitation raises the likelihood of movement initiation and accelerates locomotion  
45 and biases action selection [25–29]. Enhanced dopamine levels have been found to increase bias  
46 toward the exploration of novel choices as opposed to the exploitation of learned options [30–32].  
47 Dopamine also drives the learning of reward-informative stimuli [33–35]. Dopamine neurons are  
48 necessary for the attention signal in the amygdala, which accelerates RL [36,37]. Prefrontal  
49 dopamine is involved in working memory maintenance and has been suggested to reflect cognitive  
50 effort [38,39]. These findings suggest that, in its target regions, dopamine guides which stimuli the  
51 agent learns to respond to in the environment.

52 This case raises the theoretical possibility that midbrain dopamine may also be sensitive to  
53 changes in effective task dimensionality, which refers to the number of environmental stimuli or  
54 features associated with a task [40–42]. In addition to rewards and reward-predicting cues,  
55 previous studies have found phasic dopamine excitation to novel stimuli [35,43]. Dopamine

56 neurons are sensitive to changes in reward features or values [44,45]. Dopamine also responds to  
57 stimuli that are weakly or potentially related to rewards [34,46–49]. Regardless of which stimulus  
58 evoked phasic dopamine activity, phasic dopamine activity would promote learning and  
59 locomotion in the striatum and elsewhere. Taken together, these observations suggest the  
60 possibility that one of the fundamental features of dopamine is to manage cognitive and motor  
61 resources efficiently so as to detect changes in effective task dimensionality, to learn which stimuli  
62 are more informative of rewards and to initiate a behavioral response to learned stimuli.

63

### 64 **Ramping and phasic dopamine depends on effective task dimensionality**

65 Animals do not perceive every stimulus in an environment, but they tend to recognize stimuli with  
66 saliency that exceed a certain threshold level (Fig 1A). Although experimentally inserted cues (e.g.  
67 tones, light) are usually more salient than others (e.g. wells, floor), pseudo-conditioning or  
68 generalization indicates that the latter are also informative of the reward [47–49]. Previous studies  
69 have suggested that the more salient a stimulus is, the more readily it should be learned [40,50,51].

70 To investigate the influence of effective task dimensionality on dopamine activity during RL,  
71 we considered a situation in which both weakly informative stimuli and highly informative, salient  
72 stimuli (key stimuli in Fig 1B) were present. We ran a simulation with a temporal difference (TD)  
73 learning model with an eligibility trace, the standard version known to well account for  
74 dopaminergic activity during RL [14,52]. Frequent exposure to stimuli in conditions of highly  
75 effective task dimensionality may shorten the effective time window for learning during which  
76 previously experienced stimuli affect task performance. An eligibility trace is useful to implement  
77 such an effect. Similarly to the Pearce-Hall model, we made more salient cues to be learned faster  
78 than less salient cues [50,53].

79 When effective task dimensionality is high and the distribution of stimulus value is widely  
80 dispersed (Fig 1C), the learning agent finds difficulty screening candidates for a key stimuli. In  
81 such cases, it broadly distributes cognitive resources. Our model simulation suggested that a  
82 ramping RPE appears in this situation. As learning proceeds, the number of candidates for key  
83 stimuli decreases (i.e., decreasing effective task dimensionality), and the value of key stimuli

84 increases, which favors a focused allocation of resources to the key stimuli. Our model predicted  
 85 that phasic RPE occurs in this condition (Fig 1D).

86

87

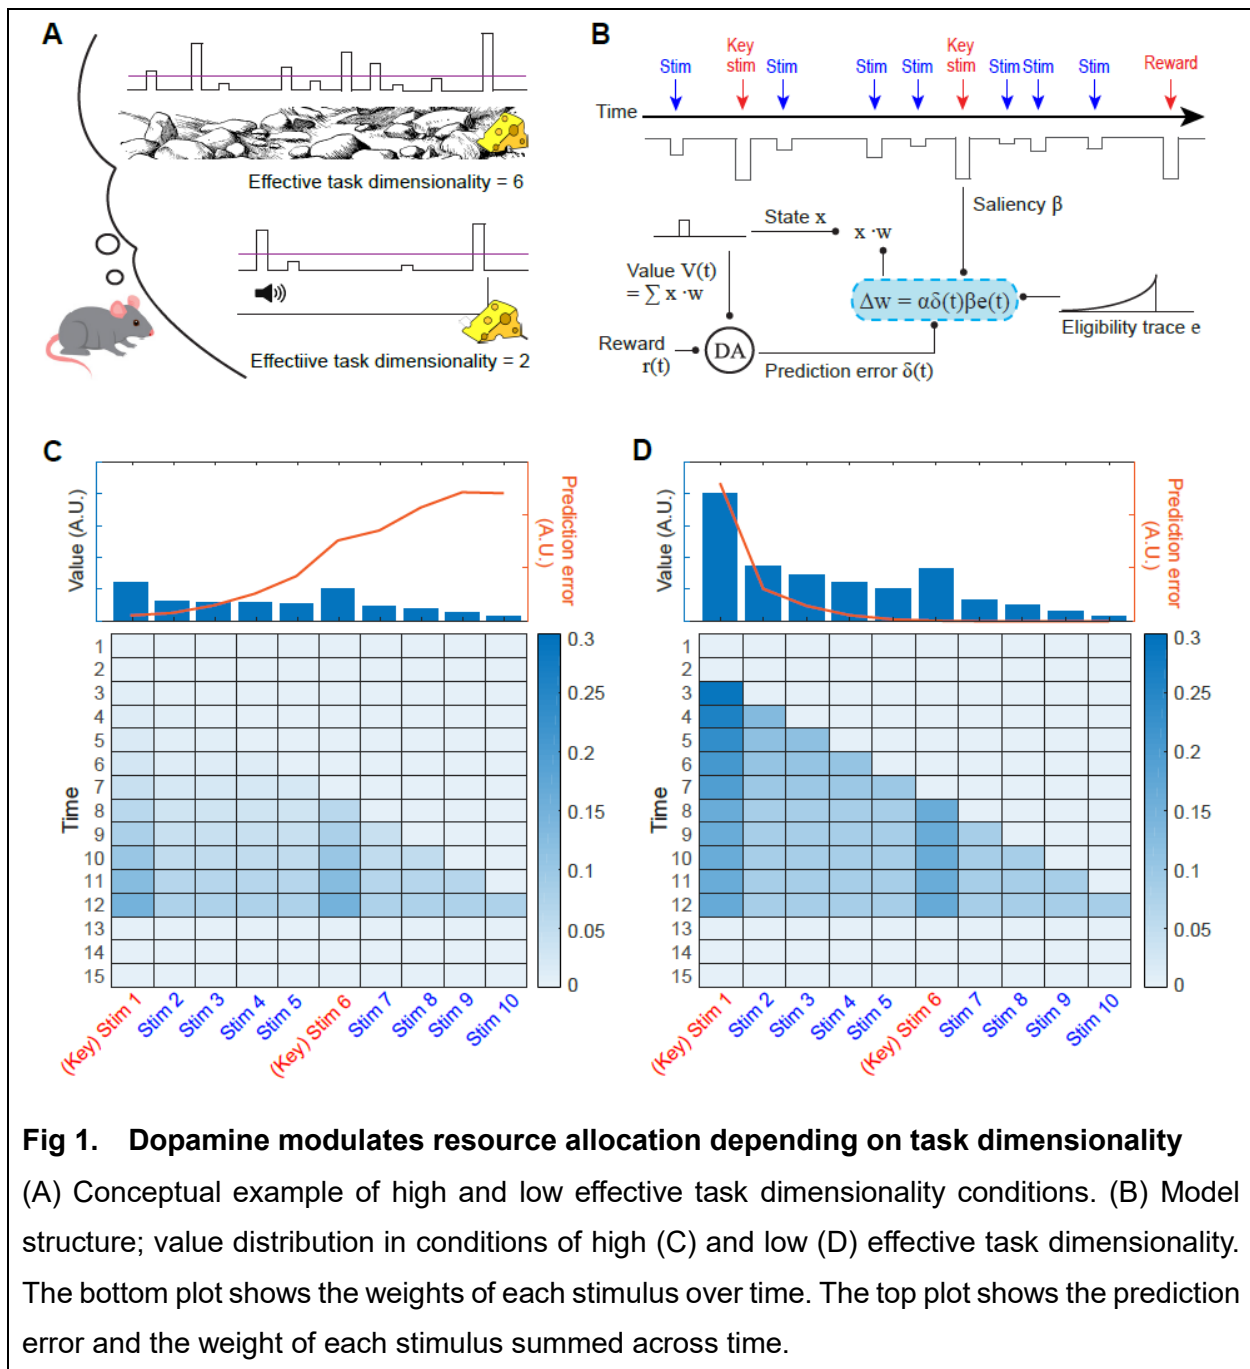

88 To further examine this hypothesis, we tested whether the model replicates previous empirical  
89 findings. First, we tested whether the model reproduced dopamine activity in a low-effective task  
90 dimensionality experiment (Fig 2A-D). In this experiment, rats were placed in a simple, small  
91 chamber [14]. Two consecutive tone cues deterministically predicted a liquid reward for which  
92 animals only had to lick a spout. During early training, dopamine neurons showed strong phasic  
93 excitation to the reward, whereas the strong dopamine excitation was transferred to the initial  
94 experimental cue during late training. Regardless of the learning stage, the omission of the second  
95 experimental cue resulted in a larger phasic response to the reward. All the dopamine activity  
96 patterns were successfully simulated by the model.

97 Next, we tested whether the model reproduced the ramping dopamine activity observed in  
98 Howe et al. (2013) (Fig 2E, F) [54]. In this experiment, rats had to travel through a large T-maze  
99 to earn a reward. The first and second tone cues indicated the start of each trial and which arm to  
100 visit to receive the reward, respectively. This experiment is more complicated than the previous  
101 one. For example, background stimuli—such as decreasing the distance between the animal and  
102 the corner of the T-maze—may provide subsidiary information to guide the animal’s behavior in  
103 a large maze, thereby increasing the effective task dimensionality. To implement a high effective  
104 task dimensionality, we increased the decay rate for the eligibility trace. The model successfully  
105 replicated the findings regarding ramping dopamine (Fig 2G).

106 According to our simulation, it appears that both the non-experimental cues increasing the  
107 effective task dimensionality and the fast decay of the eligibility trace are necessary for the  
108 ramping RPE. Although the rapid decay of the eligibility trace alone contributes to a ramping trend  
109 of RPE to some extent, the RPE inevitably peaked at the intermediate experimental cue (Fig 2H),  
110 which contradicts earlier findings that dopamine activity ramps up during the early stages of  
111 learning. Non-experimental cues were required for smoothly ramping dopamine activity because  
112 these factors cause an increase in the effective task dimensionality and a dispersion of cognitive  
113 resources. The magnitude of the RPE protrusion at the intermediate cue was dependent on the  
114 saliency contrast between experimental and non-experimental cues (Fig 2I).

115

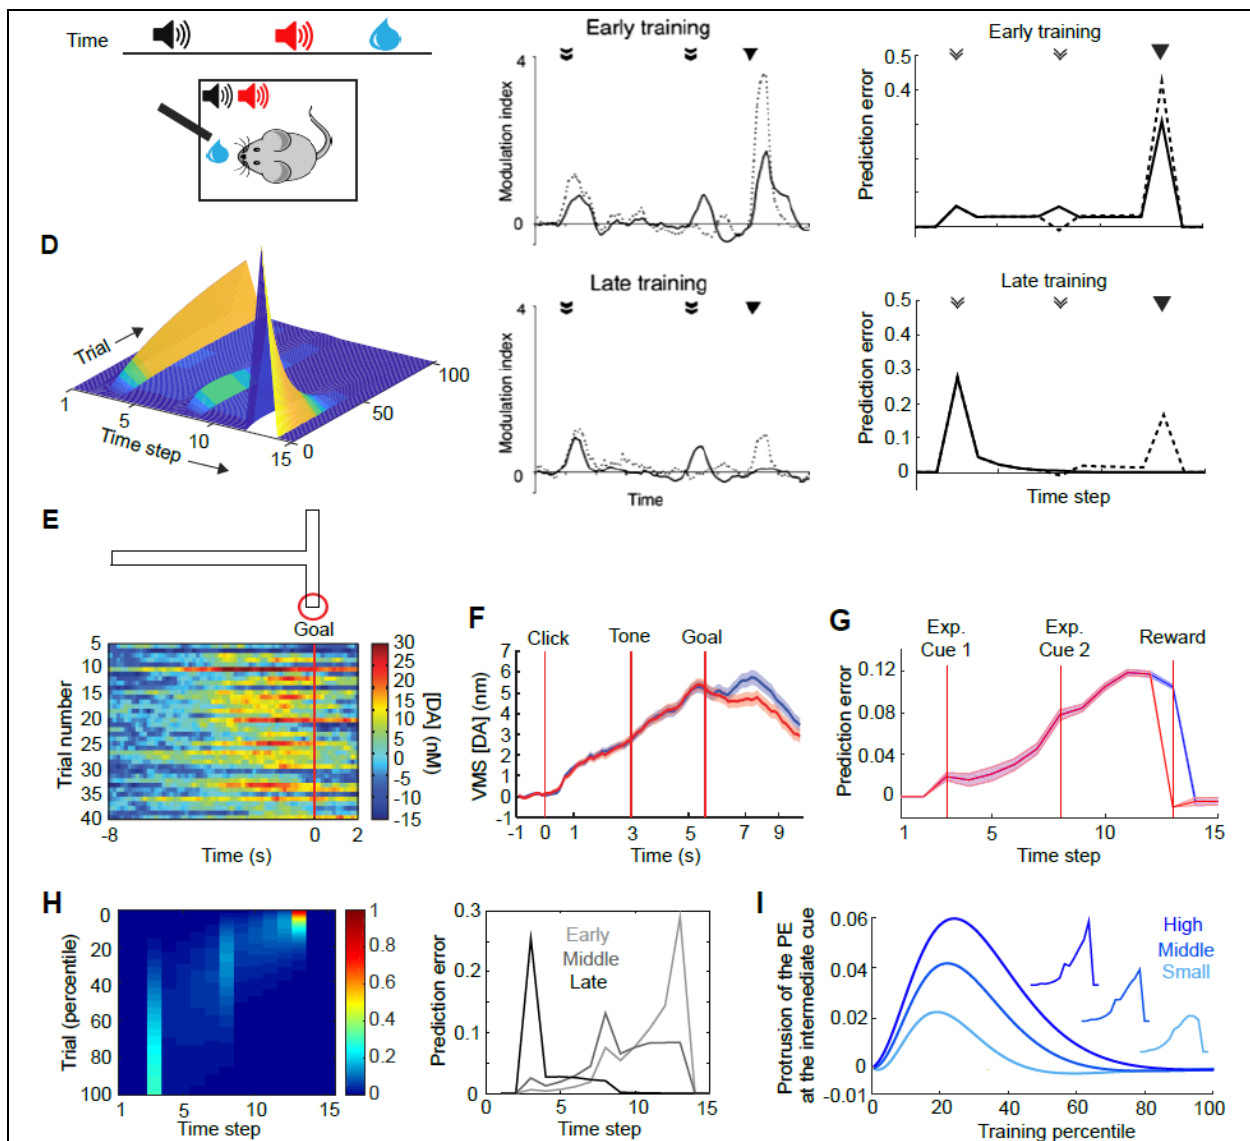

**Fig 2. Phasic and ramping dopamine in conditions of low and high effective task dimensionality.**

(A) The experimental paradigm of Pan et al. (2005). (B) The empirical results from Pan et al. (2005) during early and late training. (C) The simulation results of the model during early and late training. The agent was assumed to have completed training when the values of the first experimental cue converged. To clearly demonstrate how the shape of the RPE signal changed during the learning, the 10th, 20th and 80th percentiles of training were used to simulate early, middle and late training stages.  $\lambda$ ,  $\alpha$ , and  $\gamma$  were 0.9, 0.005 and 0.9, respectively. The  $\beta$  of the experimental stimuli were 2, and the  $\beta$  of other stimuli were 1. (D) The simulation results

of the model throughout learning. (E-F) The experimental results of Howe et al. (2013). (G) The model behavior during early training. All other values were the same as (C). (H) The behavior of a model that does not have non-experimental stimuli. The RPE signal of the model throughout learning (left). The RPE signal of the model during early, middle and late training (right).  $\lambda$  of 0.5 was used. (I) As the saliency contrast between experimental and non-experimental cues increased, the RPE at the intermediate experimental cue protruded accordingly. The level of the protrusion of the RPE at the intermediate experimental cue was measured as the RPE at the intermediate experimental cue minus the average of the RPE immediately before and after the experimental cue. The inset shows the RPE trajectory during early training.

116

117

### 118 **Transition from ramping to phasic as RL focuses resources on a few important cues**

119 The model predicted that the RPE peaks at reward onset in the early stage of learning, but as  
120 learning proceeds, the peak time point gradually transitions to the onset of an initial cue (Fig 3 B,  
121 D). This simulation result is consistent with previous experimental result [21]. In the study, rats  
122 were trained to press two different levers to collect a reward, and this training continued for a few  
123 days after their performance reached an asymptote. The authors observed that the ramping  
124 dopamine activity appeared during early training but that dopamine activity peaked at the first cue  
125 after extended training (Fig 3A, C).

126 Unpublished data also support our hypothesis. In this experiment, rats freely choose one of the  
127 two arms of a modified T-maze (Fig 3E inset). The reward probability of one arm was higher than  
128 that of the other, which remained constant within a block of 35-45 trials. The reward probability  
129 values were reversed across four blocks without any sensory cues indicating this change. Fig 3E  
130 shows dopamine activity around the reward onset. As the learning proceeded, the dopamine  
131 activity before the reward onset decreased, while phasic excitation to the reward diminished and  
132 moved to the earlier time points. This finding is fully consistent with our simulation results (Fig  
133 3B, D).

134



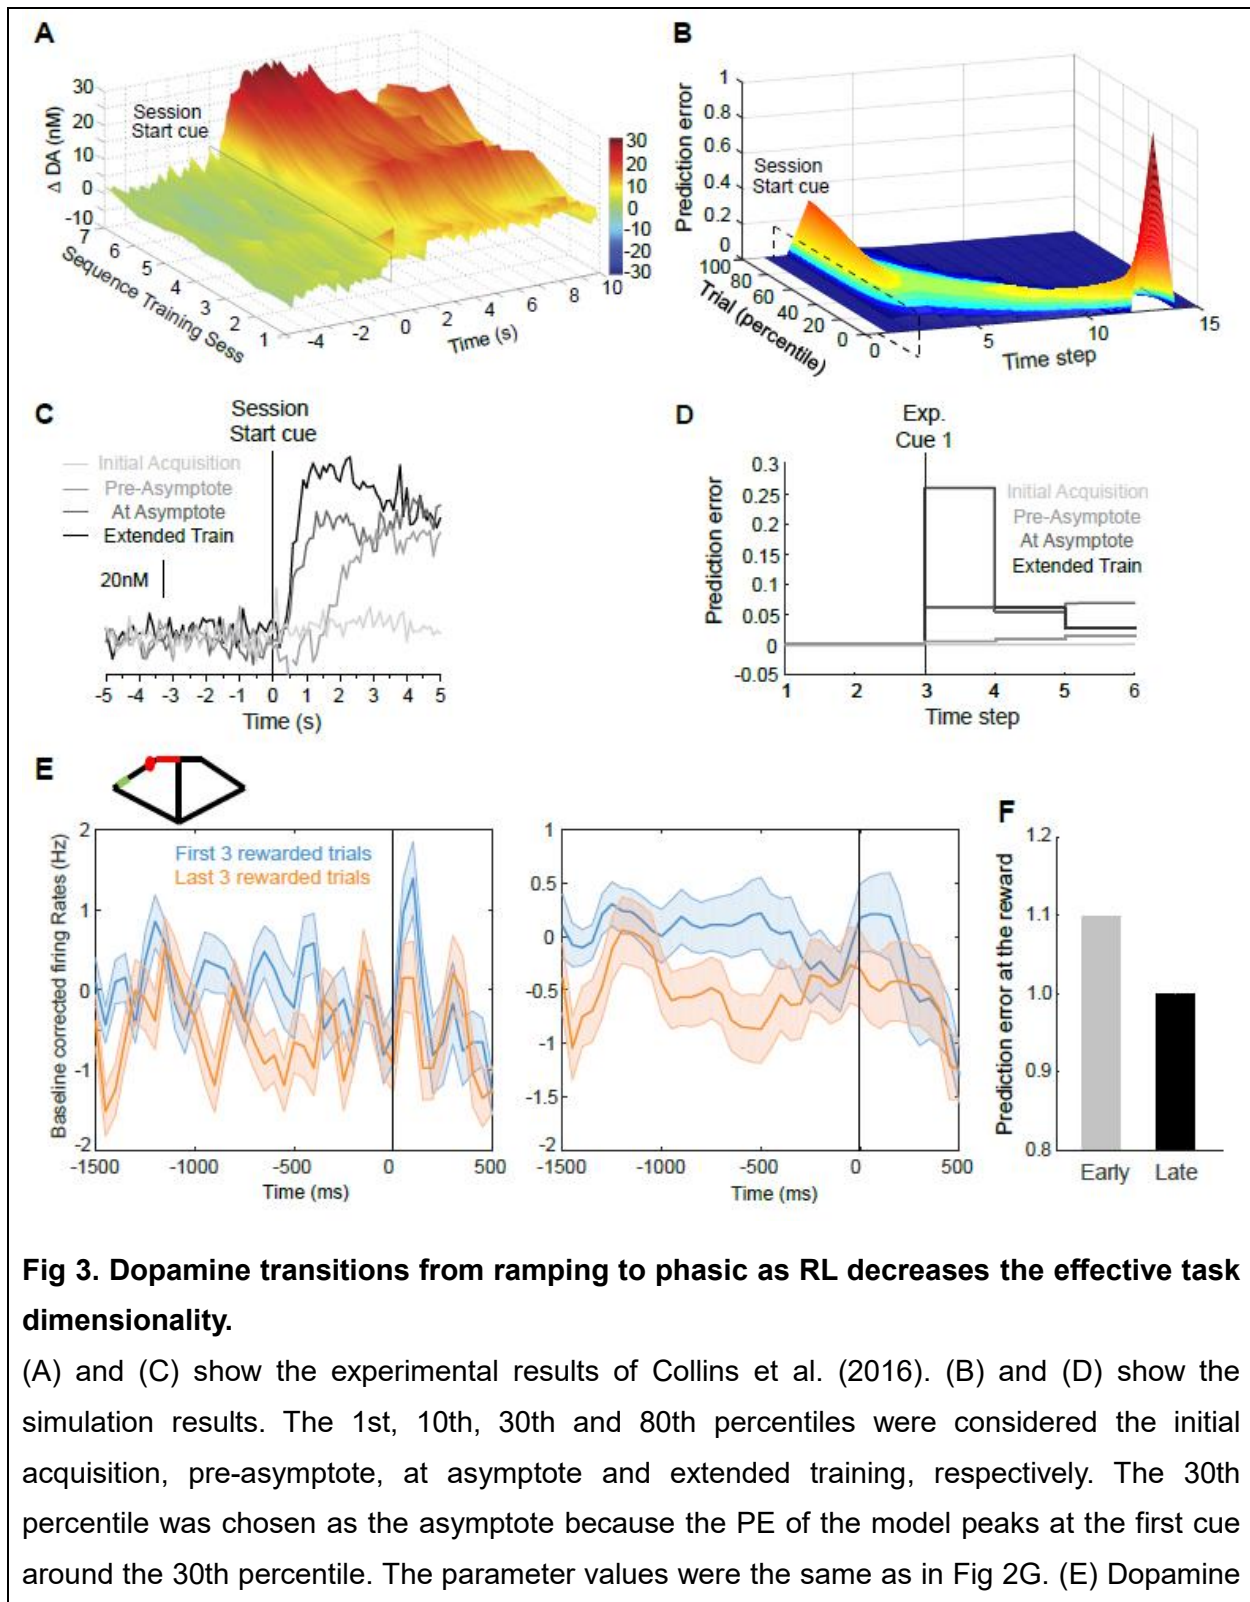

**Fig 3. Dopamine transitions from ramping to phasic as RL decreases the effective task dimensionality.**

(A) and (C) show the experimental results of Collins et al. (2016). (B) and (D) show the simulation results. The 1st, 10th, 30th and 80th percentiles were considered the initial acquisition, pre-asymptote, at asymptote and extended training, respectively. The 30th percentile was chosen as the asymptote because the PE of the model peaks at the first cue around the 30th percentile. The parameter values were the same as in Fig 2G. (E) Dopamine

activity at the beginning and at the end of each block (4 rats, 62 dopamine cells). The inset shows the experimental apparatus. Firing rates in the red region of the inset were normalized by subtracting the mean firing rate in the green region. The right plot shows smoothed PSTHs on the left plot. (F) The model prediction of the RPE at reward delivery when the size of the reward was doubled during early or late training.

135

136 Our simulation results support the view that a longer training time is required until dopamine  
137 activity transitions from ramping to phasic when effective task dimensionality is relatively high.  
138 Since the ramping RPE appeared during early training, around five times more trials were needed  
139 until the RPE peaked at the initial key stimulus (Fig 3B). The reason this transition was not  
140 observed in Howe et al. (2013) [54] might be that the animals were not trained enough for their  
141 performance to reach an asymptote (see their Figure 4e) unlike Collins et al. (2016) [21]. Even in  
142 an experiment much simpler than that of Howe et al. (2013), hundreds of trials were required until  
143 dopamine excitation to the reward were suppressed [14].

144 As learning proceeded, RPEs around the reward onset diminished, which causes a weaker  
145 sensitivity to the change in the reward value (Fig 3F). This suggests that extended training eliciting  
146 a dopamine transition from ramping to phasic makes learned responses habitual and less  
147 susceptible to environmental changes [55]. Switching to a phasic activity pattern during RL would  
148 allow the learning agent to focus cognitive and motor resources on key stimuli at the expense of  
149 reduced behavioral flexibility.

150

### 151 **Transition from phasic to ramping upon changes in reward value**

152 Learning and underlying behavior are motivated by reward value. A change in the reward earned  
153 by an animal's behavioral policy motivates it to re-learn which stimuli predict reward, and this  
154 process inevitably requires a re-allocation of resources. Our hypothesis, which concerns the role  
155 of ramping and phasic dopamine activity in resource allocation during RL, predicts that ramping  
156 activity will reappear upon changes in reward values. Both previous experimental results and our  
157 model simulation support this view. Collins et al. (2016) found that ramping activity reappears  
158 after doubling the reward value (Fig 4A), which was replicated in our model (Fig 4B) [21].

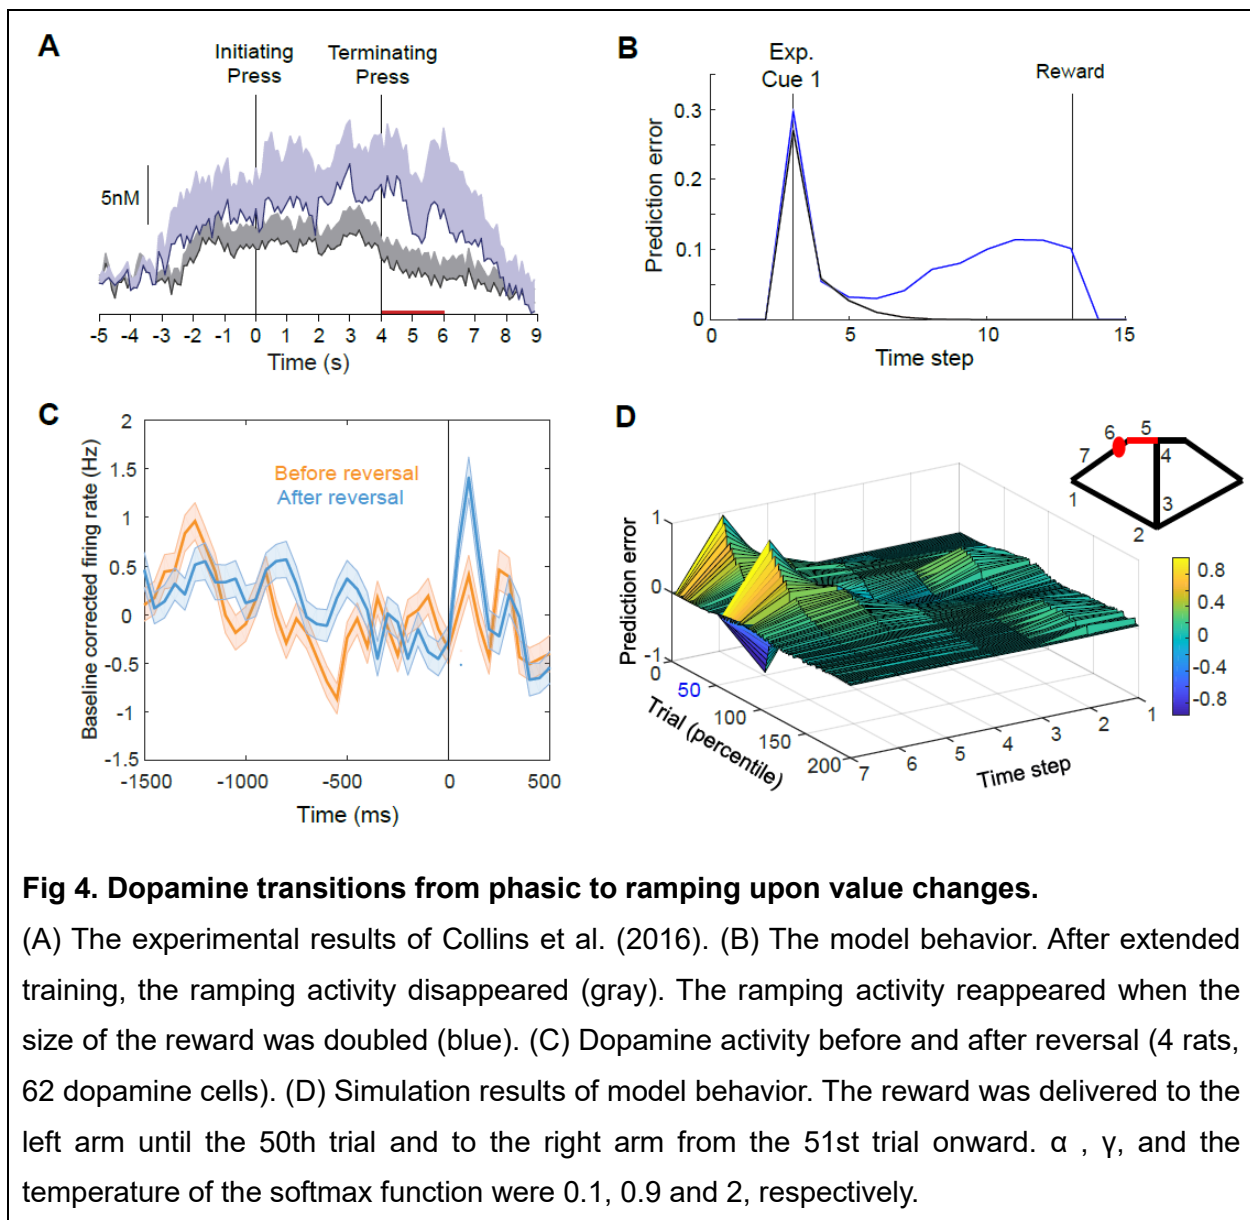

**Fig 4. Dopamine transitions from phasic to ramping upon value changes.**

(A) The experimental results of Collins et al. (2016). (B) The model behavior. After extended training, the ramping activity disappeared (gray). The ramping activity reappeared when the size of the reward was doubled (blue). (C) Dopamine activity before and after reversal (4 rats, 62 dopamine cells). (D) Simulation results of model behavior. The reward was delivered to the left arm until the 50th trial and to the right arm from the 51st trial onward.  $\alpha$ ,  $\gamma$ , and the temperature of the softmax function were 0.1, 0.9 and 2, respectively.

159

160 A similar effect was found in the unpublished data (Fig 4C). At the end of each block, the phasic  
161 excitation to reward disappeared, and dopamine activity began to peak at earlier time steps. After  
162 the reward probabilities of the left and right arms were reversed, however, the phasic excitation to  
163 reward reappeared, and dopamine activity before the reward onset increased. Because no  
164 experimental stimulus was used in this experiment, we used a basic Q-learning model for  
165 simulation. The simulation indicates that ramping RPE gradually decayed in the first block but re-

166 appeared after the reversal (Fig 4D). Overall, we showed that transitions from phasic to ramping  
167 activity reflect widespread resource distribution that allows for rapid adaptation to potential  
168 changes in the stimulus value.

169

## 170 **Conclusions**

171 In this paper, we tested the idea that dopamine transitions between ramping and phasic activities  
172 during RL reflect efficient resource allocation while the agent is learning to maximize reward.  
173 Both the simulation and experimental results suggest that dopamine activity transitions from  
174 ramping to phasic as the RL agent narrows down the candidate stimuli of the task to decrease the  
175 effective task dimensionality. The opposite occurred when the agent had to re-learn the candidate  
176 stimuli by increasing the effective task dimensionality. This affords insight into a more  
177 fundamental question: How does the animal resolve the tradeoff between prediction performance  
178 and efficient resource management?

179 Although efficient resource management is as important as reward maximization for animals'  
180 survival, efficient resource management has received relatively little attention. Recent empirical  
181 studies have found an increasingly diverse repertoire of dopamine activity, which has presented  
182 questions railing against the presumed role of dopamine [22,42,54,56–58]. Our hypothesis  
183 examining the role of dopamine in resource allocation explains why dopamine responds to novel  
184 and intense stimuli that do not encode the RPE [6,43]. RL has been found to be very inefficient in  
185 reducing task dimensionality [59]. Further work on the role of dopamine in resource allocation  
186 may shed light on how dopamine arbitrates RL and dimensionality reduction.

187

188

## 189 **Acknowledgment**

190 We thank Dr. Min Whan Jung and Dr. Sue-Hee Huh for their generosity in allowing us to use their  
191 unpublished data for this paper. We also thank Jung Hwan Shin for pre-processing the unpublished  
192 data.

## References

1. Schultz W, Dayan P, Montague R. A Neural Substrate of Prediction and Reward. *Science*. 1997;275: 1593–1599. doi:10.1126/science.275.5306.1593
2. Bayer HM, Glimcher PW. Midbrain dopamine neurons encode a quantitative reward prediction error signal. *Neuron*. 2005;47: 129–41. doi:10.1016/j.neuron.2005.05.020
3. Watabe-Uchida M, Eshel N, Uchida N. Neural Circuitry of Reward Prediction Error. *Annu Rev Neurosci*. 2017;40: 373–394. doi:10.1146/annurev-neuro-072116-031109
4. Cohen JY, Haesler S, Vong L, Lowell BB, Uchida N. Neuron-type-specific signals for reward and punishment in the ventral tegmental area. *Nature*. Nature Publishing Group; 2012;482: 85–88. doi:10.1038/nature10754
5. Hart AS, Rutledge RB, Glimcher PW, Phillips PEM. Phasic dopamine release in the rat nucleus accumbens symmetrically encodes a reward prediction error term. *J Neurosci*. 2014;34: 698–704. doi:10.1523/JNEUROSCI.2489-13.2014
6. Schultz W. Dopamine reward prediction-error signalling: a two-component response. *Nat Rev Neurosci*. 2016; doi:10.1038/nrn.2015.26
7. Steinberg EE, Keiflin R, Boivin JR, Witten IB, Deisseroth K, Janak PH. A causal link between prediction errors, dopamine neurons and learning. *Nat Neurosci*. Nature Publishing Group; 2013;16: 966–973. doi:10.1038/nn.3413
8. Sharpe MJ, Chang CY, Liu MA, Batchelor HM, Mueller LE, Jones JL, et al. Dopamine transients are sufficient and necessary for acquisition of model-based associations. *Nat Neurosci*. 2017;20: 735–742. doi:10.1038/nn.4538
9. Frank M, Seeberger L, O'Reilly R. By carrot or by stick: cognitive reinforcement learning in parkinsonism. *Science*. 2004;306: 1940–3. doi:10.1126/science.1102941
10. Chang CY, Esber GR, Marrero-Garcia Y, Yau H-J, Bonci A, Schoenbaum G. Brief optogenetic inhibition of dopamine neurons mimics endogenous negative reward prediction errors. *Nat Neurosci*. 2016;19: 111–6. doi:10.1038/nn.4191
11. Shen W, Flajolet M, Greengard P, Surmeier DJ. Dichotomous dopaminergic control of striatal synaptic plasticity. *Science*. 2008;321: 848–851. doi:10.1126/science.1160575
12. Yagishita S, Hayashi-Takagi A, Ellis-Davies GCR, Urakubo H, Ishii S, Kasai H. A critical time window for dopamine actions on the structural plasticity of dendritic spines. *Science*.

- 2014;345: 1616–1620. doi:10.1126/science.1255514
13. Wickens JR. Synaptic plasticity in the basal ganglia. *Behav Brain Res.* 2009;199: 119–28. doi:10.1016/j.bbr.2008.10.030
  14. Pan W-X, Schmidt R, Wickens JR, Hyland BI. Dopamine cells respond to predicted events during classical conditioning: evidence for eligibility traces in the reward-learning network. *J Neurosci.* 2005;25: 6235–42. doi:10.1523/JNEUROSCI.1478-05.2005
  15. Pan W-X, Schmidt R, Wickens JR, Hyland BI. Tripartite mechanism of extinction suggested by dopamine neuron activity and temporal difference model. *J Neurosci.* 2008;28: 9619–31. doi:10.1523/JNEUROSCI.0255-08.2008
  16. Starkweather CK, Babayan BM, Uchida N, Gershman SJ. Dopamine reward prediction errors reflect hidden-state inference across time. *Nat Neurosci.* 2017;20: 581–589. doi:10.1038/nn.4520
  17. Gershman SJ. Dopamine ramps are a consequence of reward prediction errors. *Neural Comput.* 2014;26: 467–71. doi:10.1162/NECO\_a\_00559
  18. Morita K, Kato A. Striatal dopamine ramping may indicate flexible reinforcement learning with forgetting in the cortico-basal ganglia circuits. *Front Neural Circuits.* 2014;8: 36. doi:10.3389/fncir.2014.00036
  19. Lloyd K, Dayan P. Tamping Ramping: Algorithmic, Implementational, and Computational Explanations of Phasic Dopamine Signals in the Accumbens. *PLoS Comput Biol.* 2015;11: 1–34. doi:10.1371/journal.pcbi.1004622
  20. Kato A, Morita K. Forgetting in Reinforcement Learning Links Sustained Dopamine Signals to Motivation. *PLoS Comput Biol.* 2016;12: 1–41. doi:10.1371/journal.pcbi.1005145
  21. Collins AL, Greenfield VY, Bye JK, Linker KE, Wang AS, Wassum KM. Dynamic mesolimbic dopamine signaling during action sequence learning and expectation violation. *Sci Rep.* Nature Publishing Group; 2016;6: 1–15. doi:10.1038/srep20231
  22. Berke JD. What does dopamine mean? *Nat Neurosci.* Springer US; 2018;21: 787–793. doi:10.1038/s41593-018-0152-y
  23. Cousins MS, Atherton A, Turner L, Salamone JD. Nucleus accumbens dopamine depletions alter relative response allocation in a T- maze cost/ benefit task. *Behav Brain Res.* 1996;74:

- 189–197. doi:10.1016/0166-4328(95)00151-4
24. Le Heron C, Plant O, Manohar S, Ang YS, Jackson M, Lennox G, et al. Distinct effects of apathy and dopamine on effort-based decision-making in Parkinson's disease. *Brain*. 2018;141: 1455–1469. doi:10.1093/brain/awy110
  25. Da Silva JA, Tecuapetla F, Paixão V, Costa RM. Dopamine neuron activity before action initiation gates and invigorates future movements. *Nature*. Nature Publishing Group; 2018;554: 244–248. doi:10.1038/nature25457
  26. Howe MW, Dombeck DA. Rapid signalling in distinct dopaminergic axons during locomotion and reward. *Nature*. Nature Publishing Group; 2016;535: 505–510. doi:10.1038/nature18942
  27. Kravitz A V, Tye LD, Kreitzer AC. Distinct roles for direct and indirect pathway striatal neurons in reinforcement. *Nat Neurosci*. 2012;15: 816–8. doi:10.1038/nn.3100
  28. Howard CD, Li H, Geddes CE, Jin X. Dynamic Nigrostriatal Dopamine Biases Action Selection. *Neuron*. Elsevier Inc.; 2017;93: 1436–1450.e8. doi:10.1016/j.neuron.2017.02.029
  29. du Hoffmann J, Nicola SM. Activation of Dopamine Receptors in the Nucleus Accumbens Promotes Sucrose-Reinforced Cued Approach Behavior. *Front Behav Neurosci*. 2016;10: 144. doi:10.3389/fnbeh.2016.00144
  30. Kayser AS, Mitchell JM, Weinstein D, Frank MJ. Dopamine, locus of control, and the exploration-exploitation tradeoff. *Neuropsychopharmacology*. Nature Publishing Group; 2015;40: 454–462. doi:10.1038/npp.2014.193
  31. Costa VD, Tran VL, Turchi J, Averbeck BB. Dopamine modulates novelty seeking behavior during decision making. *Behav Neurosci*. 2014;128: 556–566. doi:10.1037/a0037128
  32. Beeler J, Daw N. Tonic dopamine modulates exploitation of reward learning. *Front Behav ...* 2010;4: 1–14. doi:10.3389/fnbeh.2010.00170
  33. Chang CY, Gardner M, Di Tillio MG, Schoenbaum G. Optogenetic Blockade of Dopamine Transients Prevents Learning Induced by Changes in Reward Features. *Curr Biol*. Elsevier Ltd.; 2017;27: 3480–3486.e3. doi:10.1016/j.cub.2017.09.049
  34. Sadacca BF, Jones JL, Schoenbaum G. Midbrain dopamine neurons compute inferred and cached value prediction errors in a common framework. *Elife*. 2016;5.

doi:10.7554/eLife.13665

35. Lak A, Stauffer WR, Schultz W. Dopamine neurons learn relative chosen value from probabilistic rewards. *Elife*. 2016;5: 1–19. doi:10.7554/eLife.18044
36. Roesch MR, Esber GR, Li J, Daw ND, Schoenbaum G. Surprise! Neural correlates of Pearce-Hall and Rescorla-Wagner coexist within the brain. *Eur J Neurosci*. 2012;35: 1190–1200. doi:10.1111/j.1460-9568.2011.07986.x
37. Esber GR, Roesch MR, Bali S, Trageser J, Bissonette GB, Puche AC, et al. Attention-related pearce-kaye-hall signals in basolateral amygdala require the midbrain dopaminergic system. *Biol Psychiatry*. Elsevier Inc.; 2012;72: 1012–1019. doi:10.1016/j.biopsych.2012.05.023
38. Westbrook A, Braver TS. Dopamine Does Double Duty in Motivating Cognitive Effort. *Neuron*. Elsevier; 2016;89: 695–710. doi:10.1016/j.neuron.2016.07.020
39. Jacob SN, Ott T, Nieder A. Dopamine Regulates Two Classes of Primate Prefrontal Neurons That Represent Sensory Signals. *J Neurosci*. 2013;33: 13724–13734. doi:10.1523/JNEUROSCI.0210-13.2013
40. Nasser HM, Calu DJ, Schoenbaum G, Sharpe MJ. The dopamine prediction error: Contributions to associative models of reward learning. *Front Psychol*. 2017;8: 1–17. doi:10.3389/fpsyg.2017.00244
41. Leong YC, Radulescu A, Daniel R, DeWoskin V, Niv Y. Dynamic Interaction between Reinforcement Learning and Attention in Multidimensional Environments. *Neuron*. Elsevier Inc.; 2017;93: 451–463. doi:10.1016/j.neuron.2016.12.040
42. Lau B, Monteiro T, Paton JJ. The many worlds hypothesis of dopamine prediction error: implications of a parallel circuit architecture in the basal ganglia. *Curr Opin Neurobiol*. Elsevier Ltd; 2017;46: 241–247. doi:10.1016/j.conb.2017.08.015
43. Menegas W, Babayan BM, Uchida N, Watabe-Uchida M. Opposite initialization to novel cues in dopamine signaling in ventral and posterior striatum in mice. *Elife*. 2017;6: 1–26. doi:10.7554/eLife.21886
44. Takahashi YK, Batchelor HM, Liu B, Khanna A, Morales M, Schoenbaum G. Dopamine Neurons Respond to Errors in the Prediction of Sensory Features of Expected Rewards. *Neuron*. Elsevier Inc.; 2017;95: 1395–1405.e3. doi:10.1016/j.neuron.2017.08.025
45. Collins AGE, Frank MJ. Surprise! Dopamine signals mix action, value and error. *Nat*



- Neurosci. 2016;19: 3–5. doi:10.1038/nn.4207
46. Kim HF, Ghazizadeh A, Hikosaka O. Dopamine Neurons Encoding Long-Term Memory of Object Value for Habitual Behavior. *Cell*. Elsevier Inc.; 2015;163: 1165–1175. doi:10.1016/j.cell.2015.10.063
  47. Sheafor PJ. “Pseudoconditioned” jaw movements of the rabbit reflect associations conditioned to contextual background cues. *J Exp Psychol Anim Behav Process*. 1975;1: 245–60. Available: <http://www.ncbi.nlm.nih.gov/pubmed/1185111>
  48. Sheafor PJ, Gormezano I. Conditioning the rabbit’s (*Oryctolagus cuniculus*) jaw-movement response: US magnitude effects on URs, CRs, and pseudo-CRs. *J Comp Physiol Psychol*. 1972;81: 449–56. Available: <http://www.ncbi.nlm.nih.gov/pubmed/4649185>
  49. Schultz W. Potential vulnerabilities of neuronal reward, risk, and decision mechanisms to addictive drugs. *Neuron*. Elsevier Inc.; 2011;69: 603–17. doi:10.1016/j.neuron.2011.02.014
  50. Li J, Schiller D, Schoenbaum G, Phelps EA, Daw ND. Differential roles of human striatum and amygdala in associative learning. *Nat Neurosci*. Nature Publishing Group; 2011;14: 1250–1252. doi:10.1038/nn.2904
  51. Nassar MR, Rumsey KM, Wilson RC, Parikh K, Heasley B, Gold JI. Rational regulation of learning dynamics by pupil-linked arousal systems. *Nature Neuroscience*. 2012. pp. 1040–1046. doi:10.1038/nn.3130
  52. Montague PR, Dayan P, Sejnowski TJ. A framework for mesencephalic dopamine systems based on predictive Hebbian learning. *J Neurosci*. 1996;16: 1936–1947. doi:10.1111/j.156.635
  53. Pearce JM, Hall G. A Model for Pavlovian Learning: Variations in the Effectiveness of Conditioned But Not of Unconditioned Stimuli. *Psychol Rev*. 1980;87: 532–552. Available: <https://pdfs.semanticscholar.org/bfde/4e5ddaa6a968df9984b557bacc7cb38fb82.pdf>
  54. Howe MW, Tierney PL, Sandberg SG, Phillips PEM, Graybiel AM. Prolonged dopamine signalling in striatum signals proximity and value of distant rewards. *Nature*. Nature Publishing Group; 2013;500: 575–9. doi:10.1038/nature12475
  55. Wickens JR, Horvitz JC, Costa RM, Killcross S. Dopaminergic mechanisms in actions and habits. *J Neurosci*. 2007;27: 8181–3. doi:10.1523/JNEUROSCI.1671-07.2007
  56. Lammel S, Ion DI, Roeper J, Malenka RC. Projection-specific modulation of dopamine neuron synapses by aversive and rewarding stimuli. *Neuron*. Elsevier Inc.; 2011;70: 855–

62. doi:10.1016/j.neuron.2011.03.025
57. Menegas W, Babayan BM, Uchida N, Watabe-Uchida M. Opposite initialization to novel cues in dopamine signaling in ventral and posterior striatum in mice. *Elife*. 2017;6: 1–26. doi:10.7554/eLife.21886
58. Pignatelli M, Bonci A. Role of Dopamine Neurons in Reward and Aversion: A Synaptic Plasticity Perspective. *Neuron*. Elsevier Inc.; 2015;86: 1145–1157. doi:10.1016/j.neuron.2015.04.015
59. Sutton RS, Barto AG. Reinforcement Learning: An Introduction (Adaptive Computation and Machine Learning) [Internet]. A Bradford Book; 1998. Available: <http://www.amazon.com/Reinforcement-Learning-Introduction-Adaptive-Computation/dp/0262193981>
